# Supplementary material
Source: Springer Nature journal article supplement (https://www.springermedizin.de/resource/supplementary/12998_2008_85_MOESM3_ESM.pdf/9623522)
Supplement: MOESM3 [file 9623522]

**Suunniteltu haastattelu tietojen saamiseksi neljännellä (tai aiemmin jos hoito loppuu**

**ennemmin)**

Potilas No.: \_\_\_\_\_

**1. Kuinka kauan on ensimmäisestä hoidosta?**

- 1 - 14 päivää
- 15 – 28 päivää
- 4 - 6 viikkoa
- 6 – 8 viikkoa
- Yli 8 viikkoa

**2. Potilaan kivun voimakkuus edellisen vuorokauden aikana?**

- Ei kipua
- Lievä
- Kohtalainen
- Kova
- Sietämätön

**3. Tilanne (verrattuna ensimmäiseen käyntiin)?**

- Selvästi parempi
- Todennäköisesti parempi
- Muuttumaton
- Todennäköisesti huonompi
- Varmasti huonompi

**4. Jos potilasta ei hoidettu neljää kertaa, niin kuinka monta kertaa potilasta hoidettiin?**

- 1                       2                       3

**5. Miksi hoito lopetettiin ennen neljättä käyntiä?**

- Tarpeeton – OK
- Ei palannut
  
- Ohjattu muualle.

Miksi? \_\_\_\_\_

(English translation)

**Planned interview for the fourth visit (or earlier if the patient is discharged)**

**1. Time elapsed from the first treatment?**

1-14 days/15-28 days/4-5weeks/6-8 weeks/More than 8 weeks

**2. The intensity of pain during the past 24 hours?**

No pain/Mild/Moderate/Severe/Unbearable

**3. Present situation (compared to the 1st visit)?**

Clearly better/maybe better/unchanged/maybe worse/definitely worse

**4. If the patient was not treated four times... How many treatments were given?**

1/2/3

**5. Why was the patient discharged or not treated four times?**

No treatment necessary-patient OK/Patient did not return/Referred (why?)
